# Supplementary material
Source: Royal Society of Chemistry journal article supplement (doi:10.1039/d6ja00116e)
Supplement: d6ja00116e1.xlsx [file d6ja00116e1.xlsx]

## Sheet: Evaluation of Digestion Methods
These data are reflected in Figures 1–3 and Tables 2 and 3, and are interpreted in Section 3.1
Table S1: Raw data for ICP-MS analysis of Bulk monazite sample for 4 samples prepared by: 4-Acid method (HF/HCl/HNO3/HClO4); 3-Acid method = HF/HCl/HNO3; EPA method; and alkali fusion method*																		Table S2: Raw data for ICP-MS analysis of Conc monazite sample for 4 samples prepared by: 4-Acid method (HF/HCl/HNO3/HClO4); 3-Acid method = HF/HCl/HNO3; EPA method; and alkali fusion method*
Sample ID	Element																	Sample ID	Element
	Y	La	Ce	Pr	Nd	Sm	Eu	Gd	Tb	Dy	Ho	Er	Yb	Lu					Y	La	Ce	Pr	Nd	Sm	Eu	Gd	Tb	Dy	Ho	Er	Yb	Lu
	4-Acid method																		4-Acid method
	Concentration (mg.kg-1)																		Concentration (mg.kg-1)
Sample1-1	143.19	849.13	1597.46	183.24	643.86	108.81	4.67	89.79	8.01	38.05	4.01	13.68	11.35	1.67				Sample1-1	3989.83	33794.8	66451.4	7382.47	25279.5	4057.18	182.97	3265.88	355.78	1332.27	163.28	387.23	198.54	26.68
Sample1-2	143.86	859.81	1625.5	184.58	647.2	109.81	5.01	90.45	8.34	38.38	4.01	13.68	11.35	1.67				Sample1-2	3885.96	32882.2	64773.5	7212.2	24823.1	3956.8	177.57	3206.48	349.11	1302.41	159.78	375.48	195.36	26.05
Sample2-1	143.87	845.01	1596.36	182.28	622.3	106.81	4.72	87.26	7.75	37.4	3.71	13.81	11.12	1.37				Sample2-1	3859.67	32940.7	64715	7193.33	24715.3	3929	180.67	3141.33	345.33	1280.33	160.33	375.33	192.33	25.67
Sample2-2	144.54	851.75	1590.63	182.61	640.84	108.15	4.72	89.29	8.09	37.74	3.71	13.48	11.12	1.37				Sample2-2	3885.67	32954	65083	7207	24570.7	3900	174.67	3156	343.67	1278.33	158	370.33	191.67	25.67
Average	143.865	851.425	1602.49	183.178	638.55	108.395	4.78	89.1975	8.0475	37.8925	3.86	13.6625	11.235	1.52				Average	3905.28	33142.9	65255.7	7248.75	24847.2	3960.74	178.97	3192.42	348.473	1298.34	160.347	377.092	194.475	26.0175
%Recovery	0.757105	1.01922	0.960855	0.973792	1.04544	0.966195	0.741085	0.998014	0.795208	0.823347	0.547518	0.659228	0.512312	0.43741				%Recovery	0.84851	0.975929	0.972194	0.965006	0.98619	0.987924	0.99261	1.00445	0.968288	0.929765	0.865539	0.79143	0.550956	0.461917
	3-Acid method																		3-Acid method
	Concentration (mg.kg-1)																		Concentration (mg.kg-1)
Sample1-1	127.38	745.92	1490.15	159.65	569.29	95.79	4.08	78.46	6.79	33.29	3.4	12.23	10.53	0.68				Sample1-1	2950.27	21208.3	42070.4	4746.66	16392.9	2684.58	116.82	2147.2	243.99	936.58	117.49	280.71	159.88	21.36
Sample1-2	128.74	753.74	1513.93	161.68	559.78	94.77	3.74	77.11	6.79	33.29	3.4	12.23	10.19	0.68				Sample1-2	2919.56	20930.6	41316.8	4682.24	16224.3	2617.16	115.49	2119.49	239.65	922.23	117.49	286.38	161.55	21.7
Sample2-1	138.23	837.3	1572.75	178.24	636.24	106.15	4.63	86.31	7.61	36.38	3.64	13.23	10.91	0.66				Sample2-1	3073.58	22334.1	44798.7	5049.83	17127.4	2803.01	122.41	2353.85	255.18	976.25	124.08	291.97	160.54	21.4
Sample2-2	137.9	828.7	1567.46	178.24	628.64	105.49	4.63	86.97	7.61	36.04	3.64	12.9	11.24	0.66				Sample2-2	3112.04	22257.9	44420.7	4992.64	17563.2	2804.01	122.41	2339.13	258.19	1017.06	124.08	294.65	161.87	21.4
Average	133.062	791.415	1536.07	169.453	598.487	100.55	4.27	82.2125	7.2	34.75	3.52	12.6475	10.7175	0.67				Average	3013.86	21682.7	43151.6	4867.84	16826.9	2727.19	119.282	2239.92	249.252	963.03	120.785	288.428	160.96	21.465
%Recovery	0.700255	0.94738	0.921032	0.900828	0.979846	0.896267	0.662016	0.91986	0.711462	0.755065	0.499291	0.610253	0.488714	0.192806				%Recovery	0.654829	0.638471	0.642883	0.648042	0.667866	0.68024	0.661569	0.704758	0.692589	0.689646	0.651984	0.605342	0.456006	0.381092
	EPA method																		EPA method
	Concentration (mg.kg-1)																		Concentration (mg.kg-1)
Sample1-1	39.23	283.92	589.07	62.7	219.94	36.33	0.64	29.26	1.61	10.93	0	2.57	0.32	0				Sample1-1	1643.97	15911.5	31515.6	3533.72	11528.2	1836.58	78.79	1599.55	160.18	592.41	68.42	149.81	49.29	3.89
Sample1-2	39.87	286.82	591.96	63.67	216.72	35.69	0.64	28.62	1.61	10.93	0	2.57	0.64	0				Sample1-2	1614.46	15656.9	30950.7	3476.65	11426.1	1810.96	78.15	1570.36	157.26	578.79	67.44	148.51	48.64	3.89
Sample2-1	35.09	256.34	522.09	55.88	189.73	31.19	0.32	24.69	1.3	9.1	-0.32	1.95	0	0				Sample2-1	1421.07	13504.2	26633.4	2964.88	9881.77	1573.13	67.98	1343.11	135.95	494.52	57.67	127.9	42.2	3.22
Sample2-2	36.06	263.16	542.88	57.83	193.63	31.51	0.32	25.99	1.3	9.42	-0.32	1.95	0	0				Sample2-2	1408.51	13366	26573.5	2945.88	9803.16	1536.73	67.01	1343.43	134.02	495.81	57.35	126.61	40.59	3.22
Average	37.5625	272.56	561.5	60.02	205.005	33.68	0.48	27.14	1.455	10.095	-0.16	2.26	0.24	0				Average	1522	14609.6	28918.3	3230.28	10659.8	1689.35	72.9825	1464.11	146.852	540.382	62.72	138.208	45.18	3.555
%Recovery	0.197677	0.326274	0.336677	0.319073	0.335635	0.300212	0.0744186	0.303664	0.143775	0.219349	-0.022695	0.109047	0.0109439	0				%Recovery	0.330689	0.430197	0.430831	0.430038	0.42309	0.421373	0.404778	0.460662	0.408054	0.386979	0.338556	0.290065	0.127997	0.0631158
	Fusion method																		Fusion method
	Concentration (mg.kg-1)																		Concentration (mg.kg-1)
Sample1-1	195.9	877.48	1737.65	196.96	638	117.35	6.83	93.51	10.42	47.75	7.18	22.32	22.02	3.53				Sample1-1	4264.98	31456.8	62462.3	6980.39	23256.5	3722.01	165.42	2951.16	330.85	1299.19	170.49	441.69	322.41	51.76
Sample1-2	197.55	879.48	1758.37	198.44	644.54	117.59	6.77	89.97	10.6	47.87	7.3	20.79	23.14	3.53				Sample1-2	4237.41	31095	61740.4	6926.37	23165.9	3700.63	166.55	2936.54	331.41	1290.75	169.36	434.38	322.97	51.76
Sample2-1	183.83	794.95	1592.55	178.73	588.35	107.23	6.13	87.39	9.76	44.51	6.94	20.06	21.36	3.42				Sample2-1	4942.5	36359.2	71794.9	8046.86	27205.5	4325.21	195.81	3410.02	390.43	1504.42	201.19	512.22	386.25	60.89
Sample2-2	182.8	789.58	1582.52	178.3	572.3	106.58	6.07	86.63	9.7	43.96	6.78	19.73	21.2	3.42				Sample2-2	4965.18	36930.5	72491	8092.83	27152.4	4288.79	193.43	3415.39	386.85	1491.29	199.99	517.59	380.28	60.89
Average	190.02	835.372	1667.77	188.108	610.797	112.188	6.45	89.375	10.12	46.0225	7.05	20.725	21.93	3.475				Average	4602.52	33960.4	67122.1	7511.61	25195.1	4009.16	180.303	3178.28	359.885	1396.41	185.257	476.47	352.978	56.325
*Each sample result represents an average of four replicate analyses																		*Each sample result represents an average of four replicate analyses

## Sheet: Bulk -Z score and Recovery
These data are reflected in Table4, and are interpreted in Section 3.2
Isotope	139La		140Ce		141Pr		146Nd		152Sm		151Eu
Sample ID	La		Ce		Pr		Nd		Sm		Eu			% Recovery (according to Fusion method)
	Conc.[mg/kg]	Z	Conc.[mg/kg]	Z	Conc.[mg/kg]	Z	Conc.[mg/kg]	Z	Conc.[mg/kg]	Z	Conc.[mg/kg]	Z		Sample ID	La	Ce	Pr	Nd	Sm	Eu
3Acid-Bulk-1	272.757	-0.544503	618.239	-0.487331	71.5699	-0.454356	265.172	-0.417951	90.011	-0.014245	9.00419	0.691231		3Acid-Bulk-1	0.0770469	0.0866753	0.0889506	0.0942445	0.183072	0.37608
3Acid-Bulk-2	536.613	-0.223466	1148.87	-0.17978	132.419	-0.14349	469.355	-0.123747	87.7419	-0.0314539	6.17419	0.356071		3Acid-Bulk-2	0.151579	0.161068	0.164577	0.166813	0.178457	0.257879
3Acid-Bulk-3	457.73	-0.319444	986.513	-0.273882	115.954	-0.227608	421.382	-0.192871	80.0987	-0.0894207	6.41447	0.384527		3Acid-Bulk-3	0.129297	0.138306	0.144113	0.149763	0.162912	0.267915
3Acid-Bulk-4	334.473	-0.469413	742.513	-0.415303	87.2396	-0.374303	317.383	-0.342721	61.3607	-0.231531	5.69661	0.29951		3Acid-Bulk-4	0.0944799	0.104098	0.108426	0.112801	0.124801	0.237932
3Acid-Bulk-5	1977.6	1.52981	4091.33	1.52565	452.192	1.49016	1595.14	1.49837	281.607	1.43883	13.5006	1.22375		3Acid-Bulk-5	0.558623	0.573593	0.562006	0.566928	0.572757	0.563884
3Acid-Bulk-6	1751.63	1.25486	3580.14	1.22937	403.934	1.24362	1398.08	1.21444	248.212	1.18556	12.0286	1.04942		3Acid-Bulk-6	0.494789	0.501925	0.502029	0.496892	0.504835	0.502402
3Acid-Bulk-7	422.402	-0.362428	909.828	-0.318328	106.883	-0.27395	391.628	-0.235742	73.9576	-0.135995	6.28723	0.369457		3Acid-Bulk-7	0.119318	0.127555	0.132839	0.139188	0.150421	0.2626
Average	821.887		1725.35		195.742		694.02		131.856		8.44371			Average Recovery	0.232162	0.241889	0.243277	0.246661	0.268179	0.35267
STD	720.277		1459.05		160.506		555.238		91.8893		3.16764			% Recovery (according to Fusion method)
%RSD	87.637		84.5658		81.9991		80.0031		69.6893		37.5148			Sample ID	La	Ce	Pr	Nd	Sm	Eu
4Acid -Bulk Sample -1	3279.9	0.315474	6684.39	0.496642	738.041	0.242697	2598.25	-1.14622	448.125	-1.17029	21.978	-0.866556		4Acid -Bulk Sample -1	0.926486	0.937133	0.917274	0.923445	0.911436	0.917961
4Acid -Bulk Sample -2	3174.72	-0.907181	6443.83	-1.01926	719.301	-0.842943	2636.02	-0.490815	456.564	-0.327356	22.0444	-0.670582		4Acid -Bulk Sample -2	0.896777	0.903406	0.893983	0.936868	0.928599	0.920734
4Acid -Bulk Sample -3	3238.51	-0.165632	6556.31	-0.310447	728.317	-0.320636	2689.81	0.442528	469.741	0.988816	22.4919	0.650288		4Acid -Bulk Sample -3	0.914796	0.919176	0.905189	0.955983	0.955399	0.939424
4Acid -Bulk Sample -4	3233.26	-0.226717	6543.5	-0.391176	725.542	-0.481421	2617.86	-0.806005	454.366	-0.546901	21.9961	-0.813312		4Acid -Bulk Sample -4	0.913312	0.91738	0.901739	0.930413	0.924129	0.918714
4Acid -Bulk Sample -5	3333.22	0.935416	6820.2	1.35243	752.769	1.09587	2756.35	1.59734	473.616	1.37583	22.8013	1.56353		4Acid -Bulk Sample -5	0.94155	0.956172	0.935578	0.979634	0.96328	0.952347
4Acid -Bulk Sample -6	3131.35	-1.41138	6413.5	-1.21034	713.183	-1.19735	2635.85	-0.493767	450.161	-0.966982	22.0257	-0.725755		4Acid -Bulk Sample -6	0.884526	0.899155	0.886379	0.936807	0.915575	0.919953
4Acid -Bulk Sample -7	3378.35	1.46002	6777.31	1.08216	759.81	1.50379	2715.99	0.896934	466.318	0.646882	22.5638	0.862391		4Acid -Bulk Sample -7	0.954298	0.950159	0.94433	0.96529	0.948437	0.942426
AVG	3252.76		6605.58		733.852		2664.31		459.842		22.2716			Average Recovery	0.918821	0.926083	0.912067	0.94692	0.935265	0.930223
STD	86.0211		158.692		17.2619		57.6247		10.0114		0.338787			% Recovery (according to Fusion method)
RSD	2.64456		2.40239		2.35224		2.16284		2.17715		1.52116			Sample ID	La	Ce	Pr	Nd	Sm	Eu
MW-Bulk Sample-1	2953.34	-1.4164	5988.7	-1.2775	675.098	-1.14938	2473.23	-1.13825	428.536	-1.03806	20.8743	-0.975526		MW-Bulk Sample-1	0.834243	0.839599	0.839045	0.879011	0.871594	0.87186
MW-Bulk Sample-2	3109.16	-0.491889	6226.73	-0.582536	695.297	-0.599929	2527.97	-0.703171	436.386	-0.696135	21.2871	-0.538871		MW-Bulk Sample-2	0.878257	0.87297	0.864149	0.898465	0.887559	0.889104
MW-Bulk Sample-3	3231.97	0.236762	6483.2	0.166262	723.32	0.162366	2597.83	-0.14794	445.405	-0.303276	21.4921	-0.322095		MW-Bulk Sample-3	0.912947	0.908927	0.898978	0.923293	0.905903	0.897665
MW-Bulk Sample-4	3214.92	0.135601	6466.88	0.118606	721.786	0.120635	2648.92	0.258171	454.858	0.108469	21.8351	0.0407086		MW-Bulk Sample-4	0.908131	0.906638	0.897071	0.941452	0.925128	0.911993
MW-Bulk Sample-5	3369.52	1.05293	6843.66	1.21868	765.377	1.30642	2770.74	1.22639	480.662	1.23247	22.6002	0.849845		MW-Bulk Sample-5	0.951804	0.959462	0.951249	0.984747	0.977611	0.943947
MW-Bulk Sample-6	3046.14	-0.865777	6109.13	-0.925891	678.711	-1.05111	2507.81	-0.86339	434.326	-0.785865	20.9961	-0.846676		MW-Bulk Sample-6	0.860457	0.856483	0.843535	0.891301	0.88337	0.876948
MW-Bulk Sample-7	3419.39	1.34877	6865.48	1.28238	761.869	1.211	2788.58	1.36818	486.4	1.4824	23.4916	1.79261		MW-Bulk Sample-7	0.965889	0.962521	0.946889	0.991087	0.989281	0.981178
AVG	3192.06		6426.26		717.351		2616.44		452.368		21.7966			Average Recovery	0.901676	0.900943	0.89156	0.929908	0.920064	0.910385
STD	168.542		342.508		36.7615		125.814		22.9573		0.945519
RSD	5.28003		5.32982		5.12462		4.80859		5.07493		4.33791
Fusion- Bulk-1	3547.79	0.0625868	7167.37	0.163457	813.957	0.387558	2846.01	0.434882	492.383	0.0687827	24.5294	1.0872
Fusion- Bulk-2	3669.27	1.05715	7342.87	0.993472	830.046	1.0541	2911.52	1.31546	502.077	1.00382	24.294	0.651397
Fusion- Bulk-3	3380.16	-1.3098	6884.27	-1.17547	772.938	-1.31183	2701.29	-1.51027	474.471	-1.65895	23.0728	-1.6098
Fusion- Bulk-4	3652.68	0.92136	7278.17	0.687479	823.045	0.764041	2842.79	0.391665	503.475	1.13874	24.2674	0.602076
Fusion- Bulk-5	3610.21	0.573667	7242.36	0.518125	811.951	0.304413	2833.79	0.270696	489.395	-0.219442	23.79	-0.281795
Fusion- Bulk-6	3368.5	-1.4053	6787.63	-1.63251	768.394	-1.50008	2723.28	-1.21465	483.245	-0.812687	23.3924	-1.01811
Fusion- Bulk-7	3552.4	0.100346	7227	0.445441	811.888	0.301802	2836.88	0.312208	496.643	0.479736	24.2495	0.569031
AVG	3540.15		7132.81		804.603		2813.65		491.67		23.9422
STD	122.142		211.441		24.1376		74.3997		10.3672		0.54009
RSD	3.4502		2.96435		2.99993		2.64424		2.10857		2.25581
*Each sample result represents an average of four replicate analyses

## Sheet: Shapiro-Wilk Bulk Sample
These data are interpreted in the statistical analysiss which described in Section 3.2
Four Acid Digestion Method
7 readings for each element obtained from the average of four replicate analyses. W and a decision at α = 0.05 are computed per element.
Sample ID	Ce	Eu	La	Nd	Pr	Sm			Coefficients aᵢ (n=7)		Δs Ce (Set 1)		Δs Eu (Set 1)		Δs La (Set 1)		Δs Nd (Set 1)		Δs Pr (Set 1)		Δs Sm (Set 1)
Concentrate-1	6684.39	21.978	3279.9	2598.25	738.041	448.125			0.6233		Δ1	406.691	Δ1	0.823281	Δ1	247.001	Δ1	158.097	Δ1	46.6271	Δ1	25.4902
Concentrate-2	6443.83	22.0444	3174.72	2636.02	719.301	456.564			0.3031		Δ2	333.478	Δ2	0.567707	Δ2	158.502	Δ2	98.1314	Δ2	33.4676	Δ2	19.5803
Concentrate-3	6556.31	22.4919	3238.51	2689.81	728.317	469.741			0.1401		Δ3	140.889	Δ3	0.466186	Δ3	46.6398	Δ3	53.9537	Δ3	12.4997	Δ3	11.9515
Concentrate-4	6543.5	21.9961	3233.26	2617.86	725.542	454.366
Concentrate-5	6820.2	22.8013	3333.22	2756.35	752.769	473.616			W critical (α = 0.05, n=7)
Concentrate-6	6413.5	22.0257	3131.35	2635.85	713.183	450.161			0.803
Concentrate-7	6777.31	22.5638	3378.35	2715.99	759.81	466.318
Mean	6605.58	22.2716	3252.76	2664.31	733.852	459.842
SS = Σ(x-mean)^2	151098	0.688661	44397.8	19923.6	1787.85	601.372
b = Σ aᵢ·Δᵢ	374.306	0.750536	208.532	135.844	40.9579	23.4973
W = b²/SS	0.927243	0.817969	0.979456	0.926222	0.938305	0.918102
Decision (α=0.05)	Do not reject normality	Do not reject normality	Do not reject normality	Do not reject normality	Do not reject normality	Do not reject normality
Three Acid Digestion Method
7 readings for each element obtained from the average of four replicate analyses. W and a decision at α = 0.05 are computed per element.
Sample ID	Ce	Eu	La	Nd	Pr	Sm			Coefficients aᵢ (n=7)		Δs Ce (Set 1)		Δs Eu (Set 1)		Δs La (Set 1)		Δs Nd (Set 1)		Δs Pr (Set 1)		Δs Sm (Set 1)
Concentrate-1	618.239	9.00419	272.757	265.172	71.5699	90.011			0.6233		Δ1	3473.09	Δ1	7.80402	Δ1	1704.85	Δ1	1329.97	Δ1	380.622	Δ1	220.247
Concentrate-2	1148.87	6.17419	536.613	469.355	132.419	87.7419			0.3031		Δ2	2837.62	Δ2	5.85442	Δ2	1417.15	Δ2	1080.7	Δ2	316.694	Δ2	174.254
Concentrate-3	986.513	6.41447	457.73	421.382	115.954	80.0987			0.1401		Δ3	239.043	Δ3	2.71697	Δ3	114.211	Δ3	77.7268	Δ3	25.5365	Δ3	9.91234
Concentrate-4	742.513	5.69661	334.473	317.383	87.2396	61.3607
Concentrate-5	4091.33	13.5006	1977.6	1595.14	452.192	281.607			W critical (α = 0.05, n=7)
Concentrate-6	3580.14	12.0286	1751.63	1398.08	403.934	248.212			0.803
Concentrate-7	909.828	6.28723	422.402	391.628	106.883	73.9576
Mean	1725.35	8.44371	821.887	694.02	195.742	131.856
SS = Σ(x-mean)^2	1.2773e+07	60.2036	3.11279e+06	1.84973e+06	154574	50661.9
b = Σ aᵢ·Δᵢ	3058.35	7.01937	1508.17	1167.42	336.809	191.485
W = b²/SS	0.732285	0.818415	0.73072	0.736791	0.733893	0.723749
Decision (α=0.05)	Reject normality	Do not reject normality	Reject normality	Reject normality	Reject normality	Reject normality
Microwave Digestion Method
7 readings for each element obtained from the average of four replicate analyses. W and a decision at α = 0.05 are computed per element.
Sample ID	Ce	Eu	La	Nd	Pr	Sm			Coefficients aᵢ (n=7)		Δs Ce (Set 1)		Δs Eu (Set 1)		Δs La (Set 1)		Δs Nd (Set 1)		Δs Pr (Set 1)		Δs Sm (Set 1)
Concentrate-1	5988.7	20.8743	2953.34	2473.23	675.098	428.536			0.6233		Δ1	876.776	Δ1	2.61733	Δ1	466.047	Δ1	315.344	Δ1	90.2792	Δ1	57.8633
Concentrate-2	6226.73	21.2871	3109.16	2527.97	695.297	436.386			0.3031		Δ2	734.532	Δ2	1.60409	Δ2	323.382	Δ2	262.924	Δ2	83.1585	Δ2	46.3355
Concentrate-3	6483.2	21.4921	3231.97	2597.83	723.32	445.405			0.1401		Δ3	256.469	Δ3	0.548004	Δ3	122.808	Δ3	120.95	Δ3	28.0231	Δ3	18.4716
Concentrate-4	6466.88	21.8351	3214.92	2648.92	721.786	454.858
Concentrate-5	6843.66	22.6002	3369.52	2770.74	765.377	480.662			W critical (α = 0.05, n=7)
Concentrate-6	6109.13	20.9961	3046.14	2507.81	678.711	434.326			0.803
Concentrate-7	6865.48	23.4916	3419.39	2788.58	761.869	486.4
Mean	6426.26	21.7966	3192.06	2616.44	717.351	452.368
SS = Σ(x-mean)^2	703869	5.36404	170438	94974.9	8108.46	3162.24
b = Σ aᵢ·Δᵢ	805.063	2.19436	405.71	293.191	85.4024	52.6983
W = b²/SS	0.920804	0.897683	0.965749	0.905092	0.899502	0.878211
Decision (α=0.05)	Do not reject normality	Do not reject normality	Do not reject normality	Do not reject normality	Do not reject normality	Do not reject normality
Alkali Fusion Method
7 readings for each element obtained from the average of four replicate analyses. W and a decision at α = 0.05 are computed per element.
Sample ID	Ce	Eu	La	Nd	Pr	Sm			Coefficients aᵢ (n=7)		Δs Ce (Set 1)		Δs Eu (Set 1)		Δs La (Set 1)		Δs Nd (Set 1)		Δs Pr (Set 1)		Δs Sm (Set 1)
Concentrate-1	7167.37	24.5294	3547.79	2846.01	813.957	492.383			0.6233		Δ1	555.24	Δ1	1.45662	Δ1	300.768	Δ1	210.234	Δ1	61.6518	Δ1	29.0042
Concentrate-2	7342.87	24.294	3669.27	2911.52	830.046	502.077			0.3031		Δ2	393.904	Δ2	0.901682	Δ2	272.519	Δ2	122.725	Δ2	50.1065	Δ2	18.8322
Concentrate-3	6884.27	23.0728	3380.16	2701.29	772.938	474.471			0.1401		Δ3	74.9915	Δ3	0.477369	Δ3	62.4243	Δ3	9.00006	Δ3	2.06994	Δ3	7.24852
Concentrate-4	7278.17	24.2674	3652.68	2842.79	823.045	503.475
Concentrate-5	7242.36	23.79	3610.21	2833.79	811.951	489.395			W critical (α = 0.05, n=7)
Concentrate-6	6787.63	23.3924	3368.5	2723.28	768.394	483.245			0.803
Concentrate-7	7227	24.2495	3552.4	2836.88	811.888	496.643
Mean	7132.81	23.9422	3540.15	2813.65	804.603	491.67
SS = Σ(x-mean)^2	268245	1.75018	89511.9	33211.9	3495.73	644.875
b = Σ aᵢ·Δᵢ	475.98	1.24809	278.815	169.497	53.9049	24.8019
W = b²/SS	0.84459	0.890037	0.868462	0.865031	0.831224	0.953881
Decision (α=0.05)	Do not reject normality	Do not reject normality	Do not reject normality	Do not reject normality	Do not reject normality	Do not reject normality

## Sheet: Bulk Samples - ANOVA
These data are reflected in Figure 5, and are interpreted in Section 3.2
Element: La
	Method
Sample ID	4ACID	MW	Fus
Bulk-1	3279.9	2953.34	3547.79		Anova: Single Factor								Anova: Single Factor
Bulk-2	3174.72	3109.16	3669.27
Bulk-3	3238.51	3231.97	3380.16		SUMMARY								SUMMARY
Bulk-4	3233.26	3214.92	3652.68		Groups	Count	Sum	Average	Variance				Groups	Count	Sum	Average	Variance
Bulk-5	3333.22	3369.52	3610.21		Column 1	8	3719.15	464.894	1.27083e+06				Column 1	7	22769.3	3252.76	7399.64
Bulk-6	3131.35	3046.14	3368.5		Column 2	8	4127.15	515.894	1.17579e+06				Column 2	7	22344.4	3192.06	28406.3
Bulk-7	3378.35	3419.39	3552.4		Column 3	8	4203.4	525.425	1.48765e+06				Column 3	7	24781	3540.15	14918.6
AVG	3252.76	3192.06	3540.15
	Method				ANOVA								ANOVA
Sample ID	4ACID	MW	Fus		Source of Variation	SS	df	MS	F	P-value	F crit		Source of Variation	SS	df	MS	F	P-value	F crit
Bulk-1	27.1374	238.722	7.64447		Between Groups	16949.1	2	8474.56	0.0064621	0.993561	3.4668		Between Groups	484018	2	242009	14.3131	0.000190449	3.55456
Bulk-2	78.0368	82.9038	129.122		Within Groups	2.75399e+07	21	1.31142e+06					Within Groups	304348	18	16908.2
Bulk-3	14.2478	39.9042	159.982
Bulk-4	19.5024	22.8544	112.537		Total	2.75569e+07	23						Total	788366	20
Bulk-5	80.4656	177.463	70.0688
Bulk-6	121.409	145.92	171.646		HSD	177.422
Bulk-7	125.593	227.325	12.2565		X1-X2	false
					X1-X3	true
					X2-X3	true
					La
					HSD	177.422	+	-
					4acid-MW	60.697	177.422	177.422
					4Acid-Fusion	-287.386	177.422	177.422
					MW-Fusion	-348.083	177.422	177.422
Element: Ce
	Method
Sample ID	4ACID	MW	Fus
Bulk-1	6684.39	5988.7	7167.37		Anova: Single Factor								Anova: Single Factor
Bulk-2	6443.83	6226.73	7342.87
Bulk-3	6556.31	6483.2	6884.27		SUMMARY								SUMMARY
Bulk-4	6543.5	6466.88	7278.17		Groups	Count	Sum	Average	Variance				Groups	Count	Sum	Average	Variance
Bulk-5	6820.2	6843.66	7242.36		Column 1	8	7535.9	941.987	5.24086e+06				Column 1	7	46239	6605.58	25183.1
Bulk-6	6413.5	6109.13	6787.63		Column 2	8	8334.66	1041.83	4.75962e+06				Column 2	7	44983.8	6426.26	117312
Bulk-7	6777.31	6865.48	7227		Column 3	8	8320.25	1040.03	6.07027e+06				Column 3	7	49929.7	7132.81	44707.5
AVG	6605.58	6426.26	7132.81
	Method				ANOVA								ANOVA
Sample ID	4ACID	MW	Fus		Source of Variation	SS	df	MS	F	P-value	F crit		Source of Variation	SS	df	MS	F	P-value	F crit
Bulk-1	78.813	437.552	34.5615		Between Groups	52226.3	2	26113.2	0.00487466	0.995138	3.4668		Between Groups	1.88849e+06	2	944245	15.132	0.000139588	3.55456
Bulk-2	161.749	199.523	210.061		Within Groups	1.12495e+08	21	5.35692e+06					Within Groups	1.12321e+06	18	62400.7
Bulk-3	49.2654	56.9459	248.542
Bulk-4	62.0764	40.6236	145.361		Total	1.12547e+08	23						Total	3.0117e+06	20
Bulk-5	214.619	417.407	109.553
Bulk-6	192.071	317.125	345.179		HSD	340.842
Bulk-7	171.729	439.224	94.1846		X1-X2	false
					X1-X3	true
					X2-X3	true
					Ce
					HSD	340.842	+	-
					4acid-MW	179.32	340.842	340.842
					4Acid-Fusion	-527.235	340.842	340.842
					MW-Fusion	-706.555	340.842	340.842
Element: Pr
	Method
	4ACID	MW	Fus
Bulk-1	738.041	675.098	813.957		Anova: Single Factor								Anova: Single Factor
Bulk-2	719.301	695.297	830.046
Bulk-3	728.317	723.32	772.938		SUMMARY								SUMMARY
Bulk-4	725.542	721.786	823.045		Groups	Count	Sum	Average	Variance				Groups	Count	Sum	Average	Variance
Bulk-5	752.769	765.377	811.951		Column 1	8	831.981	103.998	64828.9				Column 1	7	5136.96	733.852	297.975
Bulk-6	713.183	678.711	768.394		Column 2	8	923.247	115.406	59450.5				Column 2	7	5021.46	717.351	1351.41
Bulk-7	759.81	761.869	811.888		Column 3	8	940.348	117.544	77192.8				Column 3	7	5632.22	804.603	582.622
AVG	733.852	717.351	804.603
	Method				ANOVA								ANOVA
Bulk-1	4ACID	MW	Fus		Source of Variation	SS	df	MS	F	P-value	F crit		Source of Variation	SS	df	MS	F	P-value	F crit
Bulk-2	4.18942	42.2531	9.3547		Between Groups	848.557	2	424.278	0.00631767	0.993704	3.4668		Between Groups	30078.4	2	15039.2	20.2139	2.49961e-05	3.55456
Bulk-3	14.5508	22.0543	25.4434		Within Groups	1.41031e+06	21	67157.4					Within Groups	13392	18	744.002
Bulk-4	5.5348	5.96883	31.6644
Bulk-5	8.31026	4.43474	18.4421		Total	1.41115e+06	23						Total	43470.5	20
Bulk-6	18.9168	48.0261	7.34779
Bulk-7	20.6687	38.6404	36.2084		HSD	37.2173
					X1-X2	false
					X1-X3	true
					X2-X3	true
					Pr
					HSD	37.2173	+	-
					4acid-MW	16.5006	37.2173	37.2173
					4Acid-Fusion	-70.7508	37.2173	37.2173
					MW-Fusion	-87.2514	37.2173	37.2173
Element: Nd
	Method
	4ACID	MW	Fus
Bulk-1	2598.25	2473.23	2846.01		Anova: Single Factor								Anova: Single Factor
Bulk-2	2636.02	2527.97	2911.52
Bulk-3	2689.81	2597.83	2701.29		SUMMARY								SUMMARY
Bulk-4	2617.86	2648.92	2842.79		Groups	Count	Sum	Average	Variance				Groups	Count	Sum	Average	Variance
Bulk-5	2756.35	2770.74	2833.79		Column 1	8	3002.77	375.346	855910				Column 1	7	18650.1	2664.31	3320.61
Bulk-6	2635.85	2507.81	2723.28		Column 2	8	3334.27	416.784	793008				Column 2	7	18315.1	2616.44	15829.1
Bulk-7	2715.99	2788.58	2836.88		Column 3	8	3219.12	402.39	950646				Column 3	7	19695.6	2813.65	5535.32
AVG	2664.31	2616.44	2813.65
	Method				ANOVA								ANOVA
	4ACID	MW	Fus		Source of Variation	SS	df	MS	F	P-value	F crit		Source of Variation	SS	df	MS	F	P-value	F crit
Bulk-1	66.0506	143.207	32.3551		Between Groups	7081.6	2	3540.8	0.00408622	0.995923	3.4668		Between Groups	148143	2	74071.7	9.002	0.00195117	3.55456
Bulk-2	28.2831	88.4687	97.8702		Within Groups	1.81969e+07	21	866521					Within Groups	148110	18	8228.36
Bulk-3	25.5005	18.6129	112.363
Bulk-4	46.4458	32.4815	29.1398		Total	1.8204e+07	23						Total	296254	20
Bulk-5	92.0465	154.297	20.1397
Bulk-6	28.4532	108.627	90.3698		HSD	123.77
Bulk-7	51.6856	172.137	23.2282		X1-X2	false
					X1-X3	true
					X2-X3	true
					Nd
					HSD	123.77	+	-
					4acid-MW	47.8663	123.77	123.77
					4Acid-Fusion	-149.349	123.77	123.77
					MW-Fusion	-197.215	123.77	123.77
Element: Sm
	Method
	4ACID	MW	Fus
Bulk-1	448.125	428.536	492.383		Anova: Single Factor								Anova: Single Factor
Bulk-2	456.564	436.386	502.077
Bulk-3	469.741	445.405	474.471		SUMMARY								SUMMARY
Bulk-4	454.366	454.858	503.475		Groups	Count	Sum	Average	Variance				Groups	Count	Sum	Average	Variance
Bulk-5	473.616	480.662	489.395		Column 1	8	520.141	65.0176	25462.5				Column 1	7	3218.89	459.842	100.229
Bulk-6	450.161	434.326	483.245		Column 2	8	582	72.75	23636.9				Column 2	7	3166.57	452.368	527.04
Bulk-7	466.318	486.4	496.643		Column 3	8	547.468	68.4335	29274.1				Column 3	7	3441.69	491.67	107.479
AVG	459.842	452.368	491.67
	Method				ANOVA								ANOVA
	4ACID	MW	Fus		Source of Variation	SS	df	MS	F	P-value	F crit		Source of Variation	SS	df	MS	F	P-value	F crit
Bulk-1	11.7162	23.8312	0.713085		Between Groups	240.243	2	120.121	0.00459803	0.995414	3.4668		Between Groups	6098.32	2	3049.16	12.4498	0.000403057	3.55456
Bulk-2	3.2773	15.9814	10.4069		Within Groups	548614	21	26124.5					Within Groups	4408.49	18	244.916
Bulk-3	9.89946	6.9624	17.1987
Bulk-4	5.47526	2.49016	11.8055		Total	548855	23						Total	10506.8	20
Bulk-5	13.774	28.2942	2.275
Bulk-6	9.68087	18.0414	8.4253		HSD	21.3534
Bulk-7	6.47621	34.0321	4.97352		X1-X2	false
					X1-X3	true
					X2-X3	true
					Sm
					HSD	21.3534	+	-
					4acid-MW	7.4741	21.3534	21.3534
					4Acid-Fusion	-31.8282	21.3534	21.3534
					MW-Fusion	-39.3023	21.3534	21.3534
Element: Eu
	Method
	4ACID	MW	Fus
Bulk-1	21.978	20.8743	24.5294		Anova: Single Factor								Anova: Single Factor
Bulk-2	22.0444	21.2871	24.294
Bulk-3	22.4919	21.4921	23.0728		SUMMARY								SUMMARY
Bulk-4	21.9961	21.8351	24.2674		Groups	Count	Sum	Average	Variance				Groups	Count	Sum	Average	Variance
Bulk-5	22.8013	22.6002	23.79		Column 1	8	24.356	3.04449	60.3659				Column 1	7	155.901	22.2716	0.114777
Bulk-6	22.0257	20.9961	23.3924		Column 2	8	26.8706	3.35883	55.7434				Column 2	7	152.576	21.7966	0.894006
Bulk-7	22.5638	23.4916	24.2495		Column 3	8	27.0852	3.38565	69.0399				Column 3	7	167.596	23.9422	0.291697
AVG	22.2716	21.7966	23.9422
	Method				ANOVA								ANOVA
	4ACID	MW	Fus		Source of Variation	SS	df	MS	F	P-value	F crit		Source of Variation	SS	df	MS	F	P-value	F crit
Bulk-1	0.293578	0.922378	0.587183		Between Groups	0.575767	2	0.287884	0.00466462	0.995347	3.4668		Between Groups	17.7802	2	8.89009	20.508	2.28414e-05	3.55456
Bulk-2	0.227185	0.509513	0.351813		Within Groups	1296.04	21	61.7164					Within Groups	7.80288	18	0.433493
Bulk-3	0.220309	0.304547	0.869435
Bulk-4	0.27554	0.0384908	0.325175		Total	1296.62	23						Total	25.5831	20
Bulk-5	0.529703	0.803545	0.152194
Bulk-6	0.245877	0.800548	0.549869		HSD	0.898358
Bulk-7	0.292167	1.69495	0.307328		X1-X2	false
					X1-X3	true
					X2-X3	true
					Eu
					HSD	0.898358	+	-
					4acid-MW	0.474958	0.898358	0.898358
					4Acid-Fusion	-1.67062	0.898358	0.898358
					MW-Fusion	-2.14558	0.898358	0.898358

## Sheet: Conc -Z score and Recovery 
These data are reflected in Table5, and are interpreted in Section 3.2
Isotope	139La		140Ce		141Pr		146Nd		152Sm		151Eu
Sample ID	La		Ce		Pr		Nd		Sm		Eu			% Recovery (according to Fusion method)
	Conc.[mg/kg]	Z	Conc.[mg/kg]	Z	Conc.[mg/kg]	Z	Conc.[mg/kg]	Z	Conc.[mg/kg]	Z	Conc.[mg/kg]	Z		Sample ID	La	Ce	Pr	Nd	Sm	Eu
3Acid-Concentrate-1	6493.98	0.635633	13208	0.638324	1508.71	0.663504	5125.99	0.625862	916.064	0.645103	39.7503	0.750644		3Acid-Concentrate-1	0.117033	0.1204	0.123283	0.118729	0.122416	0.132209
3Acid-Concentrate-2	7247.73	0.72822	14627.4	0.724483	1642.51	0.736187	5671.21	0.710666	984.436	0.705775	42.8016	0.81746		3Acid-Concentrate-2	0.130617	0.13334	0.134217	0.131357	0.131553	0.142358
3Acid-Concentrate-3	9888.69	1.05262	20155.1	1.06	2246.35	1.06419	8029.2	1.07743	1399.64	1.07422	54.7445	1.07899		3Acid-Concentrate-3	0.178211	0.183729	0.18356	0.185974	0.187037	0.18208
3Acid-Concentrate-4	9952.21	1.06043	20156.2	1.06007	2229.78	1.05519	7867.65	1.0523	1380.51	1.05725	51.4706	1.0073		3Acid-Concentrate-4	0.179356	0.183739	0.182206	0.182232	0.184482	0.171191
3Acid-Concentrate-5	7697.06	0.783414	15528.2	0.779159	1750.67	0.794938	6111.72	0.779184	1072.81	0.784199	45.9252	0.885862		3Acid-Concentrate-5	0.138714	0.141551	0.143055	0.141561	0.143363	0.152747
3Acid-Concentrate-6	8196.88	0.844809	16345.9	0.828792	1811.49	0.827979	6284.45	0.80605	1090.79	0.800154	42.4984	0.810821		3Acid-Concentrate-6	0.147722	0.149006	0.148026	0.145561	0.145765	0.141349
3Acid-Concentrate-7	7510.3	0.760472	15305.5	0.76564	1697.07	0.765825	5914.09	0.748444	1044.08	0.758702	42.471	0.810222		3Acid-Concentrate-7	0.135349	0.139521	0.138676	0.136983	0.139523	0.141258
Average	8140.98		16475.2		1840.94		6429.19		1126.9		45.6659			Average Recovery	0.146715	0.150184	0.150432	0.148914	0.150591	0.151885
STD	1319.31		2691.43		287.235		1102.2		189.095		5.47147			% Recovery (according to Fusion method)
%RSD	16.2058		16.3362		15.6026		17.1438		16.78		11.9815			Sample ID	La	Ce	Pr	Nd	Sm	Eu
4Acid -Concentrate Sample -1	48542.1	-0.757876	96266.1	-0.856428	10571.3	-0.904533	38245.3	-1.00814	6674.98	-0.791629	263.699	-1.30211		4Acid -Concentrate Sample -1	0.874813	0.877538	0.863828	0.885843	0.891995	0.87706
4Acid -Concentrate Sample -2	48746.2	-0.587349	97883.8	-0.201025	10695.2	-0.506962	38307	-0.941405	6596.39	-1.39058	266.885	-0.688818		4Acid -Concentrate Sample -2	0.878492	0.892284	0.873959	0.887274	0.881493	0.887658
4Acid -Concentrate Sample -3	50932.8	1.23903	101023	1.07086	11170.7	1.01754	40046.5	0.93773	6927.44	1.1324	273.756	0.633463		4Acid -Concentrate Sample -3	0.917897	0.9209	0.912807	0.927565	0.925732	0.910509
4Acid -Concentrate Sample -4	50049.6	0.501364	99705.9	0.53724	11097	0.781336	39804	0.675771	6827.4	0.369973	271.228	0.146981		4Acid -Concentrate Sample -4	0.901982	0.908894	0.906788	0.921948	0.912363	0.902102
4Acid -Concentrate Sample -5	49742.1	0.244457	98480.3	0.0406505	10877.2	0.0764639	40342.2	1.25716	6916.83	1.05152	277.67	1.3868		4Acid -Concentrate Sample -5	0.896439	0.897722	0.888826	0.934414	0.924314	0.923528
4Acid -Concentrate Sample -6	50540.1	0.910995	100968	1.04866	11173.3	1.02616	39321.6	0.154558	6839.79	0.464396	274.458	0.768695		4Acid -Concentrate Sample -6	0.91082	0.920401	0.913027	0.910773	0.914019	0.912846
4Acid -Concentrate Sample -7	47593	-1.55062	94332.3	-1.63995	10388.7	-1.49	38182.8	-1.07567	6669.15	-0.836081	265.554	-0.945008		4Acid -Concentrate Sample -7	0.857709	0.85991	0.848909	0.884396	0.891216	0.883231
AVG	49449.4		98379.9		10853.3		39178.5		6778.86		270.464			Average Recovery	0.891164	0.896807	0.886878	0.907459	0.905876	0.899562
STD	1197.2		2468.14		311.845		925.688		131.213		5.19588			% Recovery (according to Fusion method)
RSD	2.42107		2.50878		2.87326		2.36275		1.93562		1.9211			Sample ID	La	Ce	Pr	Nd	Sm	Eu
MW-Concentrate Sample-1	31130.9	0.541789	62141.8	0.651722	7062.67	0.784466	24331.2	0.47039	4261.61	0.328151	165.97	0.718452		MW-Concentrate Sample-1	0.561033	0.56647	0.577124	0.563564	0.569489	0.552016
MW-Concentrate Sample-2	29507.5	-0.144517	58000.2	-0.207647	6545	-0.21617	23837	0.19173	4254.25	0.305317	159.5	0.165208		MW-Concentrate Sample-2	0.531777	0.528716	0.534823	0.552117	0.568506	0.530496
MW-Concentrate Sample-3	31261.6	0.597053	61375.7	0.492754	6890.68	0.452019	24663.7	0.657851	4349.81	0.601941	164.686	0.608665		MW-Concentrate Sample-3	0.563389	0.559486	0.56307	0.571266	0.581276	0.547745
MW-Concentrate Sample-4	31305.4	0.615571	61727.8	0.565816	6939.97	0.547288	24262.1	0.43138	4304	0.45975	159.113	0.132103		MW-Concentrate Sample-4	0.564179	0.562696	0.567098	0.561962	0.575155	0.529208
MW-Concentrate Sample-5	25408.9	-1.8772	50036.7	-1.86006	5712.56	-1.82523	20198.6	-1.85966	3544.44	-1.89797	135.507	-1.8863		MW-Concentrate Sample-5	0.457913	0.456122	0.4668	0.467842	0.473653	0.450696
MW-Concentrate Sample-6	32137.9	0.967492	63959.3	1.02885	7166.91	0.985957	25208.3	0.9649	4476.93	0.996544	169.147	0.990063		MW-Concentrate Sample-6	0.579181	0.583037	0.585642	0.58388	0.598264	0.562581
MW-Concentrate Sample-7	28193.1	-0.700189	55765.1	-0.67143	6280.04	-0.72833	21977.6	-0.856592	3900.18	-0.793738	149.051	-0.728194		MW-Concentrate Sample-7	0.508089	0.508341	0.513171	0.50905	0.521191	0.495744
AVG	29849.3		59001		6656.83		23496.9		4155.89		157.568			Average Recovery	0.537937	0.537838	0.543961	0.54424	0.555362	0.52407
STD	2365.45		4819.33		517.345		1773.65		322.158		11.6952
RSD	7.92461		8.16821		7.77164		7.54843		7.75185		7.42232
Fusion- Concentrate-1	56913	1.16176	112367	1.21695	12549.3	1.22431	44015.5	0.963987	7614.49	0.809406	308.427	1.0848
Fusion- Concentrate-2	55080.6	-0.332679	108248	-0.662694	12123.2	-0.449923	42805.4	-0.42207	7376.37	-0.658685	296.175	-0.626847
Fusion- Concentrate-3	54438.2	-0.856622	108692	-0.459979	12121.1	-0.458012	43786.6	0.701855	7600.77	0.724811	305.74	0.709484
Fusion- Concentrate-4	54276.5	-0.988537	107440	-1.03139	11990.5	-0.971143	42132.3	-1.19293	7324.69	-0.97728	290.121	-1.47277
Fusion- Concentrate-5	57411.3	1.56815	113171	1.58417	12646.9	1.60766	44318.9	1.31155	7725.31	1.49268	307.598	0.969083
Fusion- Concentrate-6	55554.1	0.0534441	109445	-0.116662	12175.3	-0.244988	42225.2	-1.08658	7314.79	-1.03835	294.371	-0.87888
Fusion- Concentrate-7	54746.1	-0.605524	108538	-0.530389	12057.5	-0.70791	42933	-0.275814	7426.02	-0.352586	302.202	0.21513
AVG	55488.5		109700		12237.7		43173.8		7483.21		300.662
STD	1226.13		2191.2		254.525		873.06		162.197		7.15753
RSD	2.2097		1.99744		2.07985		2.0222		2.16749		2.38059
*Each sample result represents an average of four replicate analyses

## Sheet: Shapiro-Wilk Concentrate Sample
These data are interpreted in the statistical analysiss which described in Section 3.2
Four Acid Digestion Method
7 readings for each element obtained from the average of four replicate analyses. W and a decision at α = 0.05 are computed per element.
Sample ID	Ce	Eu	La	Nd	Pr	Sm			Coefficients aᵢ (n=7)		Δs Ce (Set 1)		Δs Eu (Set 1)		Δs La (Set 1)		Δs Nd (Set 1)		Δs Pr (Set 1)		Δs Sm (Set 1)
Concentrate-1	96266.1	263.699	48542.1	38245.3	10571.3	6674.98			0.6233		Δ1	6690.64	Δ1	13.9713	Δ1	3339.77	Δ1	2159.47	Δ1	784.651	Δ1	331.047
Concentrate-2	97883.8	266.885	48746.2	38307	10695.2	6596.39			0.3031		Δ2	4702.01	Δ2	8.90419	Δ2	1997.98	Δ2	1801.27	Δ2	599.387	Δ2	247.677
Concentrate-3	101023	273.756	50932.8	40046.5	11170.7	6927.44			0.1401		Δ3	1822.14	Δ3	6.87041	Δ3	1303.41	Δ3	1497	Δ3	401.75	Δ3	164.806
Concentrate-4	99705.9	271.228	50049.6	39804	11097	6827.4
Concentrate-5	98480.3	277.67	49742.1	40342.2	10877.2	6916.83			W critical (α = 0.05, n=7)
Concentrate-6	100968	274.458	50540.1	39321.6	11173.3	6839.79			0.803
Concentrate-7	94332.3	265.554	47593	38182.8	10388.7	6669.15
Mean	98379.9	270.464	49449.4	39178.5	10853.3	6778.86
SS = Σ(x-mean)^2	3.65503e+07	161.983	8.59977e+06	5.14139e+06	583484	103300
b = Σ aᵢ·Δᵢ	5850.74	12.3697	2869.88	2101.69	727.033	304.502
W = b²/SS	0.93655	0.944603	0.957721	0.859129	0.905897	0.89759
Decision (α=0.05)	Do not reject normality	Do not reject normality	Do not reject normality	Do not reject normality	Do not reject normality	Do not reject normality
Three Acid Digestion Method
7 readings for each element obtained from the average of four replicate analyses. W and a decision at α = 0.05 are computed per element.
Sample ID	Ce	Eu	La	Nd	Pr	Sm			Coefficients aᵢ (n=7)		Δs Ce (Set 1)		Δs Eu (Set 1)		Δs La (Set 1)		Δs Nd (Set 1)		Δs Pr (Set 1)		Δs Sm (Set 1)
Concentrate-1	13208	39.7503	6493.98	5125.99	1508.71	916.064			0.6233		Δ1	6948.3	Δ1	14.9942	Δ1	3458.22	Δ1	2903.21	Δ1	737.645	Δ1	483.571
Concentrate-2	14627.4	42.8016	7247.73	5671.21	1642.51	984.436			0.3031		Δ2	5527.68	Δ2	12.2735	Δ2	2640.96	Δ2	2196.44	Δ2	587.27	Δ2	396.079
Concentrate-3	20155.1	54.7445	9888.69	8029.2	2246.35	1399.64			0.1401		Δ3	1040.44	Δ3	12.2461	Δ3	686.581	Δ3	370.357	Δ3	114.422	Δ3	46.7122
Concentrate-4	20156.2	51.4706	9952.21	7867.65	2229.78	1380.51
Concentrate-5	15528.2	45.9252	7697.06	6111.72	1750.67	1072.81			W critical (α = 0.05, n=7)
Concentrate-6	16345.9	42.4984	8196.88	6284.45	1811.49	1090.79			0.803
Concentrate-7	15305.5	42.471	7510.3	5914.09	1697.07	1044.08
Mean	16475.2	45.6659	8140.98	6429.19	1840.94	1126.9
SS = Σ(x-mean)^2	4.34627e+07	179.622	1.04435e+07	7.28912e+06	495022	214541
b = Σ aᵢ·Δᵢ	6152.08	14.7817	3052.17	2527.2	653.806	428.005
W = b²/SS	0.870818	1.21643	0.892019	0.876201	0.863522	0.853863
Decision (α=0.05)	Do not reject normality	Do not reject normality	Do not reject normality	Do not reject normality	Do not reject normality	Do not reject normality
Microwave Digestion Method
7 readings for each element obtained from the average of four replicate analyses. W and a decision at α = 0.05 are computed per element.
Sample ID	Ce	Eu	La	Nd	Pr	Sm			Coefficients aᵢ (n=7)		Δs Ce (Set 1)		Δs Eu (Set 1)		Δs La (Set 1)		Δs Nd (Set 1)		Δs Pr (Set 1)		Δs Sm (Set 1)
Concentrate-1	62141.8	165.97	31130.9	24331.2	7062.67	4261.61			0.6233		Δ1	13922.6	Δ1	33.6396	Δ1	6728.96	Δ1	5009.78	Δ1	1454.35	Δ1	932.49
Concentrate-2	58000.2	159.5	29507.5	23837	6545	4254.25			0.3031		Δ2	6376.7	Δ2	16.9188	Δ2	3112.36	Δ2	2686.09	Δ2	782.638	Δ2	449.629
Concentrate-3	61375.7	164.686	31261.6	24663.7	6890.68	4349.81			0.1401		Δ3	3727.57	Δ3	5.57349	Δ3	1754.14	Δ3	494.244	Δ3	394.971	Δ3	49.7519
Concentrate-4	61727.8	159.113	31305.4	24262.1	6939.97	4304
Concentrate-5	50036.7	135.507	25408.9	20198.6	5712.56	3544.44			W critical (α = 0.05, n=7)
Concentrate-6	63959.3	169.147	32137.9	25208.3	7166.91	4476.93			0.803
Concentrate-7	55765.1	149.051	28193.1	21977.6	6280.04	3900.18
Mean	59001	157.568	29849.3	23496.9	6656.83	4155.89
SS = Σ(x-mean)^2	1.39355e+08	820.665	3.3572e+07	1.8875e+07	1.60588e+06	622715
b = Σ aᵢ·Δᵢ	11133	26.8765	5383.27	4006	1199.05	724.474
W = b²/SS	0.889403	0.880195	0.863208	0.850224	0.89529	0.842861
Decision (α=0.05)	Do not reject normality	Do not reject normality	Do not reject normality	Do not reject normality	Do not reject normality	Do not reject normality
Alkali Fusion Method
7 readings for each element obtained from the average of four replicate analyses. W and a decision at α = 0.05 are computed per element.
Sample ID	Ce	Eu	La	Nd	Pr	Sm			Coefficients aᵢ (n=7)		Δs Ce (Set 1)		Δs Eu (Set 1)		Δs La (Set 1)		Δs Nd (Set 1)		Δs Pr (Set 1)		Δs Sm (Set 1)
Concentrate-1	112367	308.427	56913	44015.5	12549.3	7614.49			0.6233		Δ1	5731.22	Δ1	18.3059	Δ1	3134.83	Δ1	2186.56	Δ1	656.372	Δ1	410.526
Concentrate-2	108248	296.175	55080.6	42805.4	12123.2	7376.37			0.3031		Δ2	4118.67	Δ2	13.2269	Δ2	2474.8	Δ2	1790.27	Δ2	491.799	Δ2	289.796
Concentrate-3	108692	305.74	54438.2	43786.6	12121.1	7600.77			0.1401		Δ3	906.559	Δ3	9.56483	Δ3	807.979	Δ3	981.254	Δ3	54.2198	Δ3	224.4
Concentrate-4	107440	290.121	54276.5	42132.3	11990.5	7324.69
Concentrate-5	113171	307.598	57411.3	44318.9	12646.9	7725.31			W critical (α = 0.05, n=7)
Concentrate-6	109445	294.371	55554.1	42225.2	12175.3	7314.79			0.803
Concentrate-7	108538	302.202	54746.1	42933	12057.5	7426.02
Mean	109700	300.662	55488.5	43173.8	12237.7	7483.21
SS = Σ(x-mean)^2	2.88081e+07	307.382	9.02033e+06	4.5734e+06	388699	157848
b = Σ aᵢ·Δᵢ	4947.65	16.7592	2817.25	2042.99	565.777	375.156
W = b²/SS	0.849734	0.913752	0.879889	0.912626	0.823526	0.891631
Decision (α=0.05)	Do not reject normality	Do not reject normality	Do not reject normality	Do not reject normality	Do not reject normality	Do not reject normality

## Sheet: Concentrate Samples - ANOVA
These data are reflected in Figure 6, and are interpreted in Section 3.2
Element: La
	Method
Sample ID	4ACID	MW	Fus		Anova: Single Factor								Anova: Single Factor
Concentrate-1	48542.1	31130.9	56913
Concentrate-2	48746.2	29507.5	55080.6		SUMMARY								SUMMARY
Concentrate-3	50932.8	31261.6	54438.2		Groups	Count	Sum	Average	Variance				Groups	Count	Sum	Average	Variance
Concentrate-4	50049.6	31305.4	54276.5		Column 1	7	6933.83	990.547	288582				Column 1	7	346146	49449.4	1.4333e+06
Concentrate-5	49742.1	25408.9	57411.3		Column 2	7	12877	1839.58	1.64728e+06				Column 2	7	208945	29849.3	5.59533e+06
Concentrate-6	50540.1	32137.9	55554.1		Column 3	7	6825.51	975.074	394159				Column 3	7	388420	55488.5	1.50339e+06
Concentrate-7	47593	28193.1	54746.1
AVG	49449.4	29849.3	55488.5		ANOVA								ANOVA
	Method				Source of Variation	SS	df	MS	F	P-value	F crit		Source of Variation	SS	df	MS	F	P-value	F crit
Sample ID	4ACID	MW	Fus		Between Groups	3.4264e+06	2	1.7132e+06	2.20581	0.139057	3.55456		Between Groups	2.51534e+09	2	1.25767e+09	442.217	4.99703e-16	3.55456
Concentrate-1	907.332	1281.57	1424.47		Within Groups	1.39801e+07	18	776675					Within Groups	5.11921e+07	18	2.84401e+06
Concentrate-2	703.177	341.848	407.907
Concentrate-3	1483.37	1412.3	1050.33		Total	1.74065e+07	20						Total	2.56653e+09	20
Concentrate-4	600.235	1456.1	1212.07
Concentrate-5	292.665	4440.41	1922.76
Concentrate-6	1090.65	2288.55	65.5293		HSD	4601.46
Concentrate-7	1856.41	1656.26	742.449		X1-X2	true
					X1-X3	true
					X2-X3	true
					La
					HSD	2301.04	+	-
					4acid-MW	19600.1	2301.04	2301.04
					4Acid-Fusion	-6039.13	2301.04	2301.04
					MW-Fusion	-25639.2	2301.04	2301.04
Element: Ce
	Method
Sample ID	4ACID	MW	Fus
Concentrate-1	96266.1	62141.8	112367		Anova: Single Factor								Anova: Single Factor
Concentrate-2	97883.8	58000.2	108248
Concentrate-3	101023	61375.7	108692		SUMMARY								SUMMARY
Concentrate-4	99705.9	61727.8	107440		Groups	Count	Sum	Average	Variance				Groups	Count	Sum	Average	Variance
Concentrate-5	98480.3	50036.7	113171		Column 1	7	13315.1	1902.16	1.87046e+06				Column 1	7	688659	98379.9	6.09171e+06
Concentrate-6	100968	63959.3	109445		Column 2	7	26401.6	3771.66	6.62957e+06				Column 2	7	413007	59001	2.32259e+07
Concentrate-7	94332.3	55765.1	108538		Column 3	7	12275.6	1753.66	1.21348e+06				Column 3	7	767901	109700	4.80135e+06
AVG	98379.9	59001	109700
	Method				ANOVA								ANOVA
Sample ID	4ACID	MW	Fus		Source of Variation	SS	df	MS	F	P-value	F crit		Source of Variation	SS	df	MS	F	P-value	F crit
Concentrate-1	2113.78	3140.86	2666.57		Between Groups	1.77086e+07	2	8.85431e+06	2.73464	0.0918237	3.55456		Between Groups	9.91495e+09	2	4.95747e+09	435.899	5.6732e-16	3.55456
Concentrate-2	496.157	1000.72	1452.09		Within Groups	5.8281e+07	18	3.23784e+06					Within Groups	2.04714e+08	18	1.1373e+07
Concentrate-3	2643.02	2374.74	1007.9
Concentrate-4	1325.98	2726.85	2259.99		Total	7.59897e+07	20						Total	1.01197e+10	20
Concentrate-5	100.331	8964.25	3471.23
Concentrate-6	2588.23	4958.36	255.629		HSD	4601.46
Concentrate-7	4047.62	3235.84	1162.19		X1-X2	true
					X1-X3	true
					X2-X3	true
					Ce
					HSD	4601.46	+	-
					4acid-MW	39379	4601.46	4601.46
					4Acid-Fusion	-11320.3	4601.46	4601.46
					MW-Fusion	-50699.2	4601.46	4601.46
Element: Pr
	Method
	4ACID	MW	Fus
Concentrate-1	10571.3	7062.67	12549.3		Anova: Single Factor								Anova: Single Factor
Concentrate-2	10695.2	6545	12123.2
Concentrate-3	11170.7	6890.68	12121.1		SUMMARY								SUMMARY
Concentrate-4	11097	6939.97	11990.5		Groups	Count	Sum	Average	Variance				Groups	Count	Sum	Average	Variance
Concentrate-5	10877.2	5712.56	12646.9		Column 1	7	1809.63	258.519	19276.6				Column 1	7	75973.4	10853.3	97247.3
Concentrate-6	11173.3	7166.91	12175.3		Column 2	7	2865.81	409.402	72101.3				Column 2	7	46597.8	6656.83	267646
Concentrate-7	10388.7	6280.04	12057.5		Column 3	7	1441.62	205.946	15300.6				Column 3	7	85663.9	12237.7	64783.1
AVG	10853.3	6656.83	12237.7
	Method				ANOVA								ANOVA
	4ACID	MW	Fus		Source of Variation	SS	df	MS	F	P-value	F crit		Source of Variation	SS	df	MS	F	P-value	F crit
Concentrate-1	282.074	405.84	311.618		Between Groups	156156	2	78078.1	2.1957	0.140191	3.55456		Between Groups	1.18237e+08	2	5.91187e+07	412.766	9.17355e-16	3.55456
Concentrate-2	158.094	111.834	114.517		Within Groups	640071	18	35559.5					Within Groups	2.57806e+06	18	143226
Concentrate-3	317.313	233.85	116.576
Concentrate-4	243.656	283.137	247.18		Total	796227	20						Total	1.20815e+08	20
Concentrate-5	23.8449	944.274	409.191
Concentrate-6	320.003	510.08	62.3557		HSD	516.379
Concentrate-7	464.649	376.798	180.181		X1-X2	true
					X1-X3	true
					X2-X3	true
					Pr
					HSD	516.379	+	-
					4acid-MW	4196.51	516.379	516.379
					4Acid-Fusion	-1384.36	516.379	516.379
					MW-Fusion	-5580.86	516.379	516.379
Element: Nd
	Method
	4ACID	MW	Fus
Concentrate-1	38245.3	24331.2	44015.5		Anova: Single Factor								Anova: Single Factor
Concentrate-2	38307	23837	42805.4
Concentrate-3	40046.5	24663.7	43786.6		SUMMARY								SUMMARY
Concentrate-4	39804	24262.1	42132.3		Groups	Count	Sum	Average	Variance				Groups	Count	Sum	Average	Variance
Concentrate-5	40342.2	20198.6	44318.9		Column 1	7	5600.82	800.117	110014				Column 1	7	274249	39178.5	856899
Concentrate-6	39321.6	25208.3	42225.2		Column 2	7	9635.36	1376.48	935355				Column 2	7	164479	23496.9	3.14584e+06
Concentrate-7	38182.8	21977.6	42933		Column 3	7	5198.89	742.699	118699				Column 3	7	302217	43173.8	762234
AVG	39178.5	23496.9	43173.8
	Method				ANOVA								ANOVA
	4ACID	MW	Fus		Source of Variation	SS	df	MS	F	P-value	F crit		Source of Variation	SS	df	MS	F	P-value	F crit
Concentrate-1	933.226	834.307	841.618		Between Groups	1.72007e+06	2	860033	2.21645	0.137875	3.55456		Between Groups	1.51446e+09	2	7.57231e+08	476.749	2.57323e-16	3.55456
Concentrate-2	871.447	340.063	368.493		Within Groups	6.98441e+06	18	388023					Within Groups	2.85898e+07	18	1.58832e+06
Concentrate-3	868.045	1166.8	612.761
Concentrate-4	625.553	765.117	1041.5		Total	8.70448e+06	20						Total	1.54305e+09	20
Concentrate-5	1163.74	3298.39	1145.07
Concentrate-6	143.073	1711.4	948.652		HSD	1719.6
Concentrate-7	995.735	1519.29	240.803		X1-X2	true
					X1-X3	true
					X2-X3	true
					Nd
					HSD	1719.6	+	-
					4acid-MW	15681.6	1719.6	1719.6
					4Acid-Fusion	-3995.35	1719.6	1719.6
					MW-Fusion	-19676.9	1719.6	1719.6
Element: Sm
	Method
	4ACID	MW	Fus
Concentrate-1	6674.98	4261.61	7614.49		Anova: Single Factor								Anova: Single Factor
Concentrate-2	6596.39	4254.25	7376.37
Concentrate-3	6927.44	4349.81	7600.77		SUMMARY								SUMMARY
Concentrate-4	6827.4	4304	7324.69		Groups	Count	Sum	Average	Variance				Groups	Count	Sum	Average	Variance
Concentrate-5	6916.83	3544.44	7725.31		Column 1	7	792.076	113.154	2279.03				Column 1	7	47452	6778.86	17216.7
Concentrate-6	6839.79	4476.93	7314.79		Column 2	7	1734.31	247.758	32171				Column 2	7	29091.2	4155.89	103786
Concentrate-7	6669.15	3900.18	7426.02		Column 3	7	981.91	140.273	3352.14				Column 3	7	52382.4	7483.21	26308
AVG	6778.86	4155.89	7483.21
	Method				ANOVA								ANOVA
	4ACID	MW	Fus		Source of Variation	SS	df	MS	F	P-value	F crit		Source of Variation	SS	df	MS	F	P-value	F crit
Concentrate-1	103.872	105.717	131.284		Between Groups	70949.7	2	35474.9	2.81531	0.0863332	3.55456		Between Groups	4.30432e+07	2	2.15216e+07	438.29	5.406e-16	3.55456
Concentrate-2	182.462	98.3603	106.837		Within Groups	226813	18	12600.7					Within Groups	883864	18	49103.5
Concentrate-3	148.585	193.92	117.562
Concentrate-4	48.5451	148.112	158.512		Total	297763	20						Total	4.39271e+07	20
Concentrate-5	137.973	611.445	242.109
Concentrate-6	60.9346	321.045	168.417		HSD	302.353
Concentrate-7	109.704	255.709	57.1885		X1-X2	true
					X1-X3	true
					X2-X3	true
					Sm
					HSD	302.353	+	-
					4acid-MW	2622.97	302.353	302.353
					4Acid-Fusion	-704.351	302.353	302.353
					MW-Fusion	-3327.32	302.353	302.353
Element: Eu
	Method
	4ACID	MW	Fus
Concentrate-1	263.699	165.97	308.427		Anova: Single Factor								Anova: Single Factor
Concentrate-2	266.885	159.5	296.175
Concentrate-3	273.756	164.686	305.74		SUMMARY								SUMMARY
Concentrate-4	271.228	159.113	290.121		Groups	Count	Sum	Average	Variance				Groups	Count	Sum	Average	Variance
Concentrate-5	277.67	135.507	307.598		Column 1	7	30.5096	4.35851	4.83443				Column 1	7	1893.25	270.464	26.9971
Concentrate-6	274.458	169.147	294.371		Column 2	7	61.1539	8.73628	47.7345				Column 2	7	1102.97	157.568	136.777
Concentrate-7	265.554	149.051	302.202		Column 3	7	42.6374	6.09106	7.94573				Column 3	7	2104.63	300.662	51.2303
AVG	270.464	157.568	300.662
	Method				ANOVA								ANOVA
	4ACID	MW	Fus		Source of Variation	SS	df	MS	F	P-value	F crit		Source of Variation	SS	df	MS	F	P-value	F crit
Concentrate-1	6.76563	8.40243	7.76452		Between Groups	68.0488	2	34.0244	1.68675	0.213094	3.55456		Between Groups	79644.8	2	39822.4	555.648	6.64017e-17	3.55456
Concentrate-2	3.57901	1.93214	4.48668		Within Groups	363.088	18	20.1716					Within Groups	1290.03	18	71.6683
Concentrate-3	3.2914	7.11846	5.07815
Concentrate-4	0.763697	1.54497	10.5414		Total	431.137	20						Total	80934.8	20
Concentrate-5	7.20564	22.0606	6.93625
Concentrate-6	3.99405	11.579	6.29062		HSD	11.5511
Concentrate-7	4.91014	8.51636	1.5398		X1-X2	true
					X1-X3	true
					X2-X3	true
					Eu
					HSD	11.5511	+	-
					4acid-MW	112.896	11.5511	11.5511
					4Acid-Fusion	-30.1978	11.5511	11.5511
					MW-Fusion	-143.094	11.5511	11.5511
